# Supplementary material for: Functional Properties of the Catalytic Domain of Mouse Acidic Mammalian Chitinase Expressed in Escherichia coli
Source: MDPI journal article supplement (doi:10.3390/ijms16024028), 2015-02-13
Supplement: s1 [file s1]

## Supplementary Information

### A. Pre-Protein A-CatD-V5-His

584 amino acids 64,688 dalton

MKKKNIYSIRKLGVGIASVTLGTLTLLISGGVTPAANA AQHDEAVDNKFNKEQQNAFYEI  
LHLPNLNNEEQRNAFIQSLKDDPSQSANLLAEAKKLNDAAQAPKVDNKFNKEQQNAFYEI  
LHLPNLNNEEQRNAFIQSLKDDPSQSANLLAEAKKLNDAAQAPKVDANSYNLICIFYTNWA  
QYRPGLSFKPDDINPCLCTHLYAFAGMQNNEITTI EWNDVTLYKAFNDLKNRNSKL  
KTLAIGGWNFGTAPFTTMVSTSQRQTFTITSVIKFLRQYGF DGLDLDWEYPGSRGSP  
PQDKHLFTVLVKEMREAFEQEAI ESNRPRLMVTA AVAGGISNIQAGYEIPELSKYLDF  
IHVM TYDLHGSWEGYTGENSP LYKYPTETGSNAYLNVDYVMNYWKNNGAPAEKLIVGF  
PEYGH TFI LRNP SDNGIGAPTSGDGPAGPYTRQAGFWAYYEICTFLRSGATEVWDASQ  
EVPYAYKAN EWLGYDNIKSFSVKAQWLKQNNFGGAMIWAIDLDDFTGSFCDQGKFPLT  
STLNKALGISTEGCTAPDVPSEPVTTTPP ARGHPFEGKPIPNPLLGLDSTRTGHHHHHH

### B. Mature -Protein A-CatD-V5-His

548 amino acids 61,063 dalton

AQHDEAVDNKFNKEQQNAFYEI LHLPNLNNEEQRNAFIQSLKDDPSQSANLLAEAKKLN  
DAQAPKVDNKFNKEQQNAFYEI LHLPNLNNEEQRNAFIQSLKDDPSQSANLLAEAKKLN  
DAQAPKVDANSYNLICIFYTNWAQYRPGLSFKPDDINPCLCTHLYAFAGMQNNEITT  
IEWNDVTLYKAFNDLKNRNSKLKTLAIGGWNFGTAPFTTMVSTSQRQTFTITSVIK  
LRQYGF DGLDLDWEYPGSRGSP PQDKHLFTVLVKEMREAFEQEAI ESNRPRLMVTA AV  
AGGISNIQAGYEIPELSKYLDFIHVM TYDLHGSWEGYTGENSP LYKYPTETGSNAYLN  
VDYVMNYWKNNGAPAEKLIVGFPEYGH TFI LRNP SDNGIGAPTSGDGPAGPYTRQAGF  
WAYYEICTFLRSGATEVWDASQ EVPYAYKAN EWLGYDNIKSFSVKAQWLKQNNFGGAM  
IWAIDLDDFTGSFCDQGKFPLTSTLNKALGISTEGCTAPDVPSEPVTTTPP ARGHPFEG  
KPIPNPLLGLDSTRTGHHHHHH

**Figure S1.** Deduced amino acid sequences and molecular masses of the recombinant CatD expressed in *E. coli*. (A) Pre-Protein A-CatD-V5-His; (B) Mature-Protein A-CatD-V5-His. The amino acid sequences are color coded, consistent with Figure 1B. Blue, signal sequence of Protein A; Yellow, truncated form of Protein A; Pink, catalytic domain (CatD); Green, V5-His sequence.
